# Supplementary material for: Technical Considerations for Reduced Representation Bisulfite Sequencing with Multiplexed Libraries
Source: Hindawi journal article supplement (doi:10.1155/2012/741542), 2012-01-01
Supplement: f1 [file 741542.f1.pdf]

**Supplementary Material For:**

**Technical considerations for reduced representation bisulfite  
sequencing with multiplexed libraries**

**Aniruddha Chatterjee<sup>1,3</sup>, Euan J. Rodger<sup>1</sup>, Peter A. Stockwell<sup>2</sup>, Robert J.  
Weeks<sup>1</sup>, Ian M. Morison<sup>1,3</sup>**

*<sup>1</sup>Department of Pathology, Dunedin School of Medicine, University of Otago, 270  
Great King Street, Dunedin 9054, New Zealand, <sup>2</sup>Department of Biochemistry,  
University of Otago, 710 Cumberland Street, Dunedin 9054, New Zealand, <sup>3</sup> National  
Research Centre for Growth and Development, New Zealand*

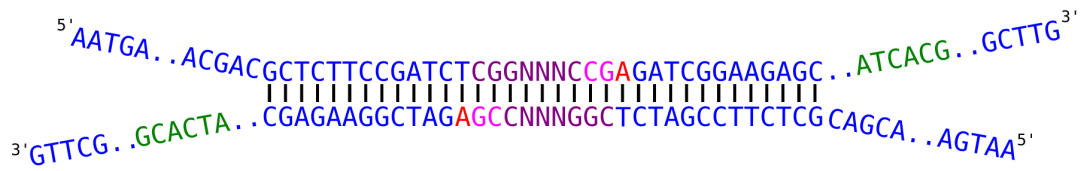

**Figure S1. Hypothetical MspI digested fragment ligated with barcoded adaptor.**

Genomic DNA was digested with MspI (C<sup>^</sup>CGG). Digested DNA (purple) was end repaired (fuchsia pink) and 3' adenine overhangs (red) were added. DNA fragments were ligated to Illumina TruSeq adaptors (blue) with a unique 6 bp index (green).

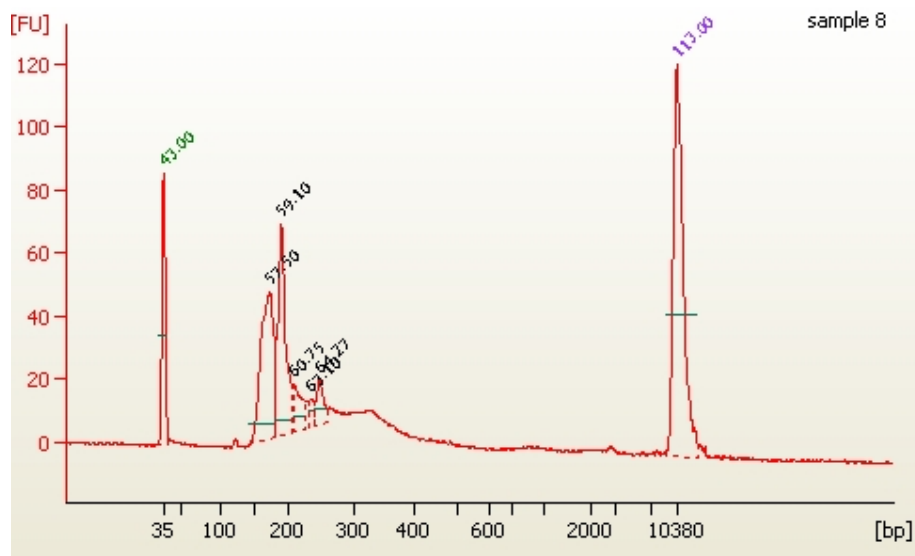

**Figure S2. Representative Bioanalyzer electropherogram of a RRBS library.**

Each of the RRBS libraries was run on an Agilent 2100 Bioanalyzer using the high sensitivity DNA kit to determine the quality of the samples. The electropherogram displays a data plot of fragment size (bp) versus fluorescence intensity (fluorescence units, FU). Peaks at 35 bp and 10380 bp represent lower and upper markers. The 160-340 bp peaks represent the RRBS library.

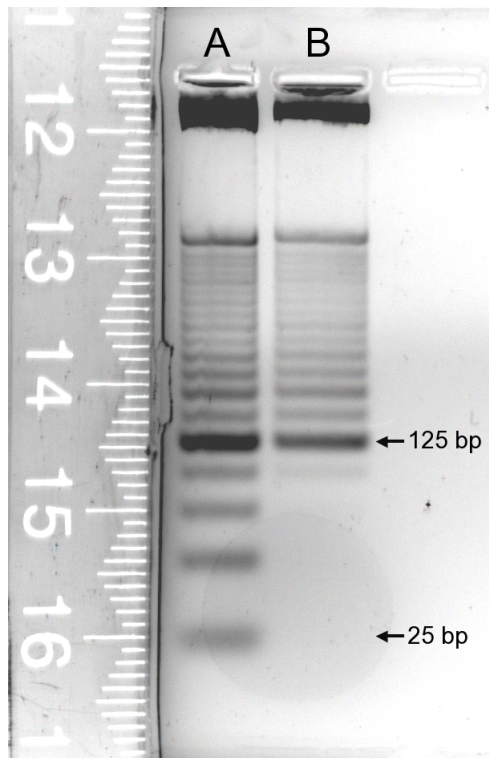

**Figure S3. Loss of smaller fragments (<100 bp) in AMPure bead purification.**

Agencourt AMPure magnetic beads were used to purify RRBS libraries following adaptor ligation. To verify exclusion of <100 bp fragments, 5  $\mu$ L of 25 bp DNA ladder was either left untreated (A) or purified using AMPure beads (B) and separated on a 3% (w/v) NuSieve agarose gel.

(a)

```
@HWI-EAS209_0006_FC706VJ:1:1:1240:20397#0/1
TGGGTGGGTTTTGTGTTTTTTTTTTTTTTTTTTTTTTTTTTTTTTTTTTTTTTTTTTTTTTTTTTTTTTTTGGGTTTTTTGTTTTTGGGGTTTTTTTT
+HWI-EAS209_0006_FC706VJ:1:1:1240:20397#0/1
ffdfcff_cdd`d`dddbdddddYOZ_VSJWSFRJIPW__[R_^BBBBBBBBBBBBBBBBBBBBBBBBBBBBBBBBBB
@HWI-EAS209_0006_FC706VJ:1:1:1240:8941#0/1
TGGGATTATGTTGTTAGGAAATGATGTTTTTTTTGATATTTTTTTTTTTTTTTTTTTTTTTTTTTTTTTGTTTGGGCTGGGAGGGGGGTTTTG
+HWI-EAS209_0006_FC706VJ:1:1:1240:8941#0/1
ab^`T_^`acddeec_cbT\Y]^Z[aadad^^Q^Y\Ub__ebbbdddddBBBBBBBBBBBBBBBBBBBBBBBBBB
```

(b)

```
@HWI-ST871:67:B02L8ACXX:3:1101:17873:2557 1:N:0:GCCAAT
AATTTTTTTTAAATTATTGCGAGGGGTTTTGGGATTATGAGGTTTGAGGGAGTTTTTTTTTCGATTTGATTTTTTT
+
;?=?BDDD)@3D9CE91:4?8:):)7(--(-5A37@CEA#####
@HWI-ST871:67:B02L8ACXX:3:1101:17830:2561 1:N:0:GCCAAT
TTTGTATATATAGATGTAGAAATTTTTTAGTTGAGTTTTTATATTTTTTTTTTTTTTTTTTTTTTTTTTTTTTTT
+
AAAADFFFHHGHHJJEGGGIJJFGIJJJJIFGGIJ4E4*?0)99?FIHIIIEFDDDBDDDDDBDDDDDBBDBB
```

**Figure S4. Examples of different formats of sequenced reads in different versions**

**of machines.** A. Two reads from a run performed on GAI machines. B. Two reads from a run performed on HiSeq2000.

**Table S1. Comparison of basic features between Illumina GAI and HiSeq 2000 sequencer**

| <b>Features</b>                                                                                                                                                                                   | <b>Illumina GAI</b>                                       | <b>Illumina HiSeq2000</b>                                                                                                             |
|---------------------------------------------------------------------------------------------------------------------------------------------------------------------------------------------------|-----------------------------------------------------------|---------------------------------------------------------------------------------------------------------------------------------------|
| <b>Chemistry</b>                                                                                                                                                                                  | Version 2                                                 | Version 3                                                                                                                             |
| <b>Tiles</b>                                                                                                                                                                                      | 120 (0.55 mm <sup>2</sup> )                               | 24 (5.5 mm <sup>2</sup> )                                                                                                             |
| <b>Flow cells</b>                                                                                                                                                                                 | 1                                                         | 2                                                                                                                                     |
| <b>Light Intensity and imaging</b>                                                                                                                                                                | Remains same throughout and smaller imaging area (TIRF)*. | Increased after 75 cycle for accurate base-calling even at the end of the reads. More than 7x larger imaging area (Epi-illumination*) |
| <b>Maximum read length (base pairs)</b>                                                                                                                                                           | 100                                                       | 150                                                                                                                                   |
| <b>Alignment output</b>                                                                                                                                                                           | 150 GB                                                    | 1.2 TB                                                                                                                                |
| <b>Base call data</b>                                                                                                                                                                             | 100 GB                                                    | 660 GB                                                                                                                                |
| <b>No of reads per lane</b>                                                                                                                                                                       | 20-30 million                                             | ~190 million                                                                                                                          |
| <b>Run time</b>                                                                                                                                                                                   | 10.5 days for PE 100 bp run                               | 8.5 days for SE                                                                                                                       |
| <b>Approx. cost of sequencing one sample**</b>                                                                                                                                                    | 2500 USD                                                  | 600 USD                                                                                                                               |
| <p>* Total Internal Reflection Fluorescence (TIRF) Microscopy; Epi-illumination involves illuminating and detecting from one side of the sample</p> <p>**Assuming 20 million reads per sample</p> |                                                           |                                                                                                                                       |

**Table S2. Comparison of Illumina Paired-End and TruSeq sample preparation**

| <b>Features</b>                                           | <b>Paired-End kit protocol</b>                                   | <b>TruSeq v2 kit protocol</b>                          |
|-----------------------------------------------------------|------------------------------------------------------------------|--------------------------------------------------------|
| Input DNA                                                 | 5 µg                                                             | 1 µg                                                   |
| Clean-up procedure                                        | Column purification                                              | AMPure XP beads                                        |
| Adaptor                                                   | Non-methylated adaptor;<br>methylated adaptor sold<br>separately | Universal methylated adaptor;<br>12 indexes available* |
| Throughput                                                | <10 at a time                                                    | Optimized for 96-well plate                            |
| Reagents                                                  | 5 enzymes; 2 substrates;<br>3 buffers                            | 4 master mixes; 1 buffer                               |
| Controls                                                  | 0                                                                | 4 In-line controls                                     |
| * TruSeq v3 kit has 24 indexes available for multiplexing |                                                                  |                                                        |

**Table S3. Multiplexed adaptor ligation protocol**

| <b>Component</b>                                                                              | <b>Volume (µL)</b> |
|-----------------------------------------------------------------------------------------------|--------------------|
| <b>MspI Digestion</b>                                                                         |                    |
| DNA (175 ng/µL)                                                                               | 14                 |
| MspI (20U/µL)                                                                                 | 4                  |
| 10× restriction buffer                                                                        | 4                  |
| MilliQ water                                                                                  | 18                 |
| TOTAL                                                                                         | 40                 |
| Incubate overnight at 37°C; QIAquick purify, 60 µL elution                                    |                    |
| <b>End Repair</b>                                                                             |                    |
| Sample (from above)                                                                           | 60                 |
| TruSeq End repair mix                                                                         | 40                 |
| TOTAL                                                                                         | 100                |
| Incubate for 30 min at 30°C; MinElute purify, 17.5 µL TE elution                              |                    |
| <b>A Addition</b>                                                                             |                    |
| Sample (from above)                                                                           | 17.5               |
| TruSeq A-tailing mix                                                                          | 12.5               |
| TOTAL                                                                                         | 30                 |
| Incubate for 30 min at 37°C                                                                   |                    |
| <b>Adaptor Ligation</b>                                                                       |                    |
| Sample (from above)                                                                           | 30                 |
| TE buffer                                                                                     | 2.5                |
| TruSeq indexed adaptor                                                                        | 2.5                |
| TruSeq DNA ligase mix                                                                         | 2.5                |
| Incubate for 10 min at 30°C, add 5 µL TruSeq stop ligase mix;<br>AMPure purify, 18 µL elution |                    |



**Table S4. PCR Master mix for bisulfite converted DNA**

| <b>Component</b>                                                                                   | <b>Volume (<math>\mu\text{L}</math>)*</b> |
|----------------------------------------------------------------------------------------------------|-------------------------------------------|
| <b>10x PfuTurbo buffer</b>                                                                         | 1.20                                      |
| <b>dNTP stock (2.5 mM)</b>                                                                         | 1.44                                      |
| <b>TruSeq primer cocktail</b>                                                                      | 1.44                                      |
| <b>BS DNA template</b>                                                                             | 1.44                                      |
| <b>PfuTurbo Cx</b>                                                                                 | 0.58                                      |
| <b>MilliQ water</b>                                                                                | 5.90                                      |
| *The volumes given are for a single 12 $\mu\text{L}$ PCR reaction and can be scaled up accordingly |                                           |
